# Supplementary material for: Hospital-based or home-based administration of oncology drugs? A micro-costing study comparing healthcare and societal costs of hospital-based and home-based subcutaneous administration of trastuzumab
Source: PubMed Central journal article supplement (PMC7487951; doi:10.1016/j.breast.2020.05.001), 2020-05-16

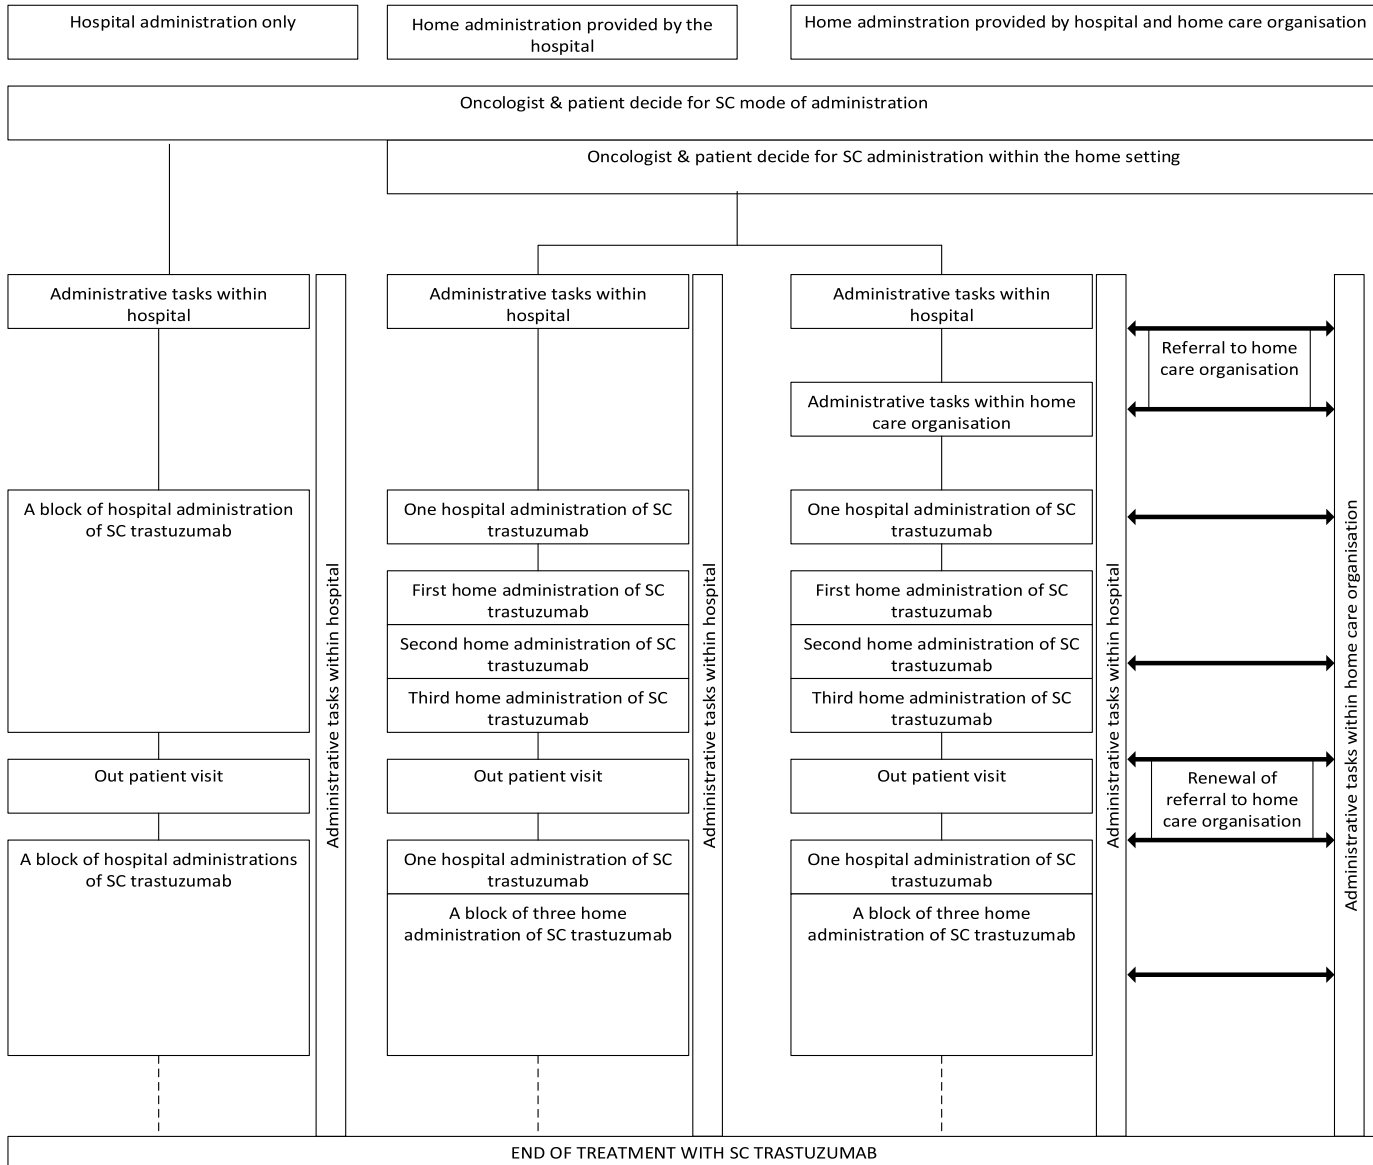

Supplement: mmc1.pdf [file mmc1.pdf]
